# Supplementary material
Source: publisher site journal article supplement (https://www.dovepress.com/article/319260)
Supplement: Supplementary file 1 [file get_supplementary_file.php]

## Supplementary Figures

**Title: Baicalin alleviates oxidative stress and inflammation in diabetic nephropathy via Nrf2 and MAPK signaling pathway**

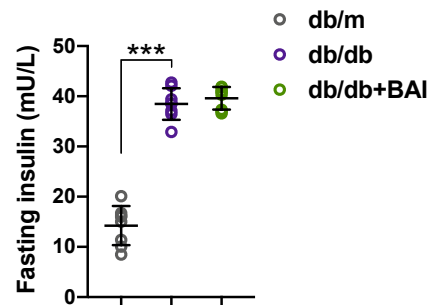

**Supplementary Fig. 1.** Fasting insulin level of different groups. All data are presented as means  $\pm$  SD. \*\*\* $p < 0.001$ .

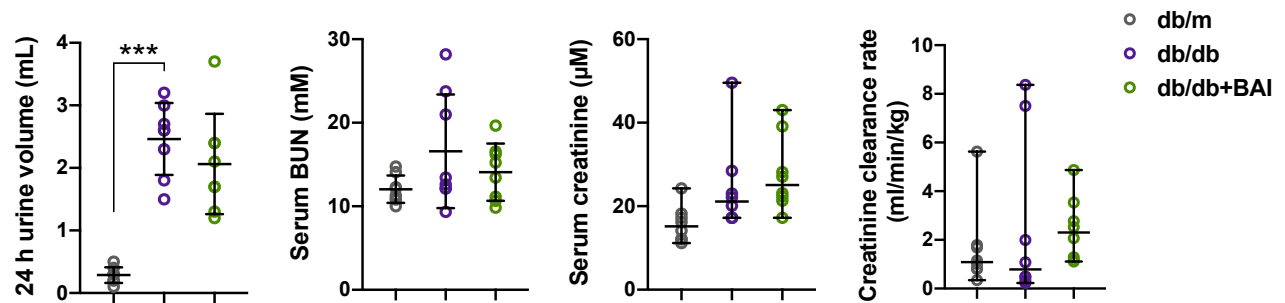

**Supplementary Fig. 2.** 24 h urine volume, serum urea nitrogen (BUN), serum creatinine and creatinine clearance rate (Ccr) of different groups. 24 h urine volume and serum BUN are presented as means  $\pm$  SD, serum creatinine and Ccr are presented as median (min - max). \*\*\* $p < 0.001$ .

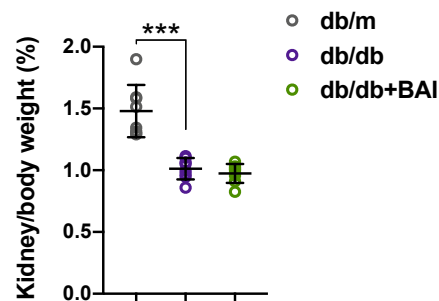

**Supplementary Fig. 3.** Kidney/body weight ratio of different groups. All data are presented as means  $\pm$  SD. \*\*\* $p < 0.001$ .

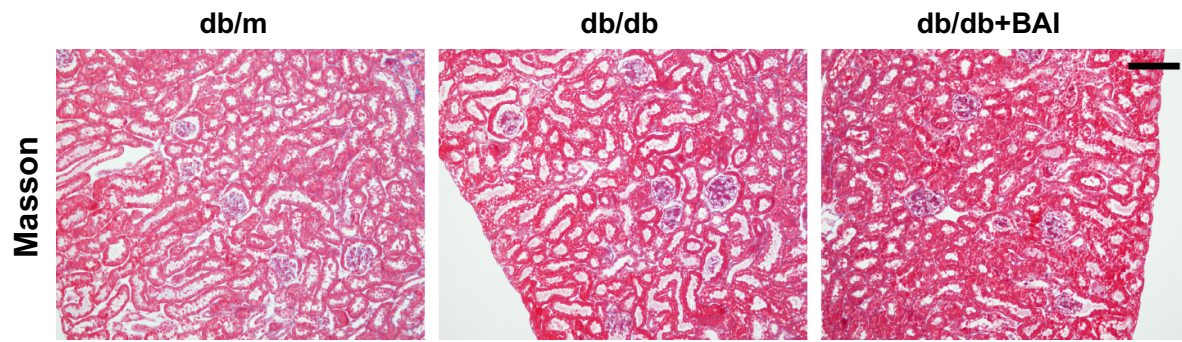

**Supplementary Fig. 4.** Representative kidney Massoon staining of different groups. Scale bar, 100  $\mu\text{m}$ . (n=8)
